1 Two Novel  $\alpha$ -L-Arabinofuranosidases from *Bifidobacterium longum* subsp. *longum*  
2 belonging to Glycoside Hydrolase Family 43 Cooperatively Degrade Arabinan  
3  
4 Masahiro Komeno,<sup>a</sup> Honoka Hayamizu,<sup>b</sup> Kiyotaka Fujita,<sup>c</sup> Hisashi Ashida<sup>a,b,#</sup>  
5  
6 <sup>a</sup>Graduate School of Biology-Oriented Science and Technology, Kindai University,  
7 Kinokawa, Wakayama, Japan  
8 <sup>b</sup>Faculty of Biology-Oriented Science and Technology, Kindai University, Kinokawa,  
9 Wakayama, Japan  
10 <sup>c</sup>Faculty of Agriculture, Kagoshima University, Kagoshima, Kagoshima, Japan  
11 <sup>#</sup>Address correspondence to Hisashi Ashida, ashida@waka.kindai.ac.jp.  
12  
13 Running title: Novel  $\alpha$ -L-arabinofuranosidases from *B. longum longum*

**ABSTRACT** Arabinose-containing poly- or oligosaccharides are suitable carbohydrate sources for *Bifidobacterium longum* subsp. *longum*, though their degradation pathways are poorly understood. In this study, we found that the gene expression levels of *bllj\_1852* and *bllj\_1853* from *B. longum* subsp. *longum* JCM 1217 were enhanced in the presence of arabinan. Both genes encode previously uncharacterized glycoside hydrolase (GH) family 43 enzymes. Subsequently, we cloned those genes and characterized the recombinant enzymes expressed in *Escherichia coli*. Both enzymes exhibited  $\alpha$ -L-arabinofuranosidase activity toward synthetic *p*-nitrophenyl glycoside, but the specificities for L-arabinofuranosyl linkages were different. BLLJ\_1852 catalyzed the hydrolysis of  $\alpha$ 1,2- and  $\alpha$ 1,3-L-arabinofuranosyl linkages found in the side chains of arabinan and arabinoxylan. BLLJ\_1852 released L-arabinose 100 times faster from arabinan than from arabinoxylan but did not act on arabinogalactan. BLLJ\_1853 catalyzed the hydrolysis of  $\alpha$ 1,5-L-arabinofuranosyl linkages found on the arabinan backbone. BLLJ\_1853 released L-arabinose from arabinan but not from arabinoxylan or arabinogalactan. Both enzyme activities were largely suppressed with EDTA treatment, suggesting that they require

divalent metal ions. BLLJ\_1852 was moderately activated in the presence of all divalent cations tested, whereas BLLJ\_1853 activity was inhibited by  $\text{Cu}^{2+}$ . The GH43 domains of BLLJ\_1852 and BLLJ\_1853 are classified into GH43 subfamilies 27 and 22, respectively, but hardly share similarity with other biochemically characterized members in the corresponding subfamilies.

**IMPORTANCE** We identified two novel  $\alpha$ -L-arabinofuranosidases from *B. longum* subsp. *longum* JCM 1217 that act on different linkages in arabinan. These enzymes may be required for efficient degradation and assimilation of arabinan in the probiotic bifidobacteria. The genes encoding these enzymes are located side-by-side in a gene cluster involved in metabolic pathways for plant-derived polysaccharides, which may confer adaptability in adult intestines.

**KEYWORDS** dietary fiber, hemicellulose, gut microbiota, intestinal microbiota, prebiotics, probiotics

## INTRODUCTION

*Bifidobacterium* spp. are gram-positive, rod-shaped, catalase-negative, strictly anaerobic bacteria. Bifidobacteria mainly inhabit the large intestines of mammals including humans. In humans, bifidobacteria are one of the dominant members of the intestinal microbiota and are believed to exert various health-promoting effects (1, 2). Bifidobacterial flora varies with age. *B. bifidum*, *B. breve*, and *B. longum* subsp. *infantis* are found in infant intestines and *B. adolescentis*, *B. catenulatum*, and *B. pseudocatenulatum* live in adult intestines. *B. longum* subsp. *longum* is found in intestines of both infants and adults (3). *B. longum* subsp. *longum* is also added to food products as probiotics because of its wide adaptation and beneficial health effects to the host (1).

In the large intestine where bifidobacteria reside, nutrient monosaccharides are limited. Therefore, bifidobacteria possess various glycosidases and sugar transporters to assimilate indigestible polysaccharides, oligosaccharides, and complex carbohydrates. Whole genome sequencing revealed that approximately 8.5 % open reading frames (ORFs) of *B. longum* NCC 2705 are related to glycan degradation and metabolism (4). In the past

decade, several groups including ours reported that bifidobacteria in infant intestines—*B. bifidum*, *B. longum* subsp. *infantis*, and *B. longum* subsp. *longum*—utilize oligosaccharides from the mother’s milk (5–11) and glycoprotein glycans secreted from the gastrointestinal tract (12–15). We also reported that *B. longum* subsp. *longum* possesses a unique metabolic pathway to assimilate glycans from extensins that are plant cell-wall glycoproteins (16–18). It has been known that oligosaccharides derived from plant matrix polysaccharides, such as arabinan, arabinoxylan, and arabinogalactan, could be carbohydrate sources for adult-type bifidobacteria (19,20). However, it is poorly understood how bifidobacteria use such dietary fibers. Therefore, we investigated the mechanism of arabinan utilization in *B. longum* subsp. *longum* inhabiting the intestines of both infants and adults.

In the Carbohydrate-Active Enzymes (CAZy) database (<http://www.cazy.org>), there are 59 putative and experimentally characterized glycosidases belonging to 23 glycoside hydrolase (GH) families from *B. longum* subsp. *longum* JCM 1217. Of these GH families, we focused on GH43 that contains hemicellulose-degrading glycosidases including  $\alpha$ -L-arabinofuranosidase,  $\beta$ -xylosidase, arabinanase, and xylanase. Nine ORFs

with eleven GH43 domains occur in the genome of *B. longum* subsp. *longum* JCM 1217. Notably, five previously uncharacterized GH43 ORFs, *bllj\_1850–bllj\_1854*, form a gene cluster. In this study, we cloned and characterized two GH43 enzymes, BLLJ\_1852 and BLLJ\_1853, and found that these glycosidases cooperatively degrade arabinan by acting on different glycosidic bonds.

## RESULTS

***Bifidobacterium longum* subsp. *longum* JCM 1217 utilizes arabinan as a carbon source.** Sugar-beet arabinan is composed of  $\alpha$ 1,5-linked poly-L-arabinofuranose as a backbone with branched side chains of  $\alpha$ 1,2- or  $\alpha$ 1,3-linked L-arabinofuranose (21). Arabino-oligosaccharides are considered to be potential prebiotics for bifidobacteria (19,20). However, it is not known whether arabinan is utilized by *B. longum* subsp. *longum*. First, we tested whether *B. longum* subsp. *longum* JCM 1217 grows in a medium with arabinan as the sole carbon source (Fig. 1). This strain grew well in the glucose-containing medium and moderately in the L-arabinose-containing one. In the

arabinan-containing medium, it reached an OD<sub>600</sub> value similar to that of L-arabinose-containing medium although the growth rate was slightly slower. This result suggests that *B. longum* subsp. *longum* JCM 1217 degrades arabinan into L-arabinose and utilizes that as a carbon source.

### **Expression of *bllj\_1852* and *bllj\_1853* was enhanced in the presence**

**of arabinan.** To identify the glycosidases responsible for the degradation of arabinan, we focused on the gene cluster consisting of *bllj\_1850–bllj\_1854*, all of which encode GH43 domain-containing proteins. Of these, we had already determined that BLLJ\_1854 was an α-L-arabinofuranosidase that preferably acted on arabinogalactan (Fujita *et al.*, submitted). Therefore, we investigated the expression of *bllj\_1850–bllj\_1853* in the presence of arabinan by semi-quantitative RT-PCR. The mRNA levels of *bllj\_1852* and *bllj\_1853* were estimated to be 4.0- and 5.4-fold higher, respectively, in arabinan medium than in glucose medium (data not shown). However, the expression of *bllj\_1850* was not significantly enhanced by arabinan (less than 1.2-fold), and mRNA of *bllj\_1851* could not be detected in this RT-PCR condition. This result strongly suggests that *bllj\_1852* and *bllj\_1853* are

involved in the utilization of arabinan in this strain.

# **Molecular cloning of BLLJ\_1852 and BLLJ\_1853.** The ORF of *bllj\_1852*

consists of 3,741 bp and encodes a polypeptide with 1,246 residues, which is predicted to contain a signal peptide (aa 1–30), LamG domain (aa 95–253), bacterial Ig-like domain (aa 669–725), GH43 domain (aa 738–1,087), and transmembrane region (aa 1,217–1,238) (Fig. 2A). The ORF of *bllj\_1853* consists of 3,294 bp and encodes a 1,097-aa polypeptide, which contains a signal peptide (aa 1–35), LamG domain (aa 81–258), GH43 domain (aa 491–782), bacterial Ig-like domain (aa 823–877), and transmembrane region (aa 1,069–1,090) (Fig. 2A). Therefore, both enzymes are predicted to be extracellular membrane-bound enzymes.

We amplified *bllj\_1852* and *bllj\_1853* without the regions encoding the N-terminal signal peptide and C-terminal transmembrane region using high-fidelity PCR on the genomic DNA from *B. longum* subsp. *longum* JCM 1217 as a template. The PCR products were ligated into pET23b vectors to express C-terminally 6×His-tagged proteins. *Escherichia coli* BL21(λDE3)Δ*lacZ* was transformed with these plasmids, and the

expression was induced by adding 1.0 mM isopropyl- $\beta$ -D-thiogalactopyranoside (IPTG).  
The recombinant proteins were extracted using BugBuster and purified with a Ni<sup>2+</sup> resin column. Purified proteins migrated as a single protein band around 130 kDa for BLLJ\_1852 and 115 kDa for BLLJ\_1853 on SDS-PAGE (Fig. 2B and 2C, respectively), which are consistent with the predicted molecular masses.

**Characterization of recombinant BLLJ\_1852 and BLLJ\_1853.** The biochemical properties of recombinant BLLJ\_1852 and BLLJ\_1853 were investigated using pNP- $\alpha$ -L-arabinofuranoside (pNP- $\alpha$ -Araf) as a substrate. The optimum pH of both glycosidases was 6.0; however, the stable pH ranges were quite different: pH 5.0–10.0 for BLLJ\_1852 and pH 9.0–10.0 for BLLJ\_1853 (Supplementary Fig. 1A and 1B, respectively). The optimum temperature of BLLJ\_1852 and BLLJ\_1853 were 45°C and 40°C, respectively. BLLJ\_1852 was stable below 50°C for a 1 hour treatment. In contrast, BLLJ\_1853 still active at 60°C for 1 hour (Supplementary Fig. 1C and 1D, respectively). Therefore, we tested the stability of BLLJ\_1853 at higher temperatures and found that greater than 50 % activity was maintained below 90°C although it gradually declined

(Supplementary Fig. 1E). The kinetic parameters of recombinant BLLJ\_1852 for pNP- $\alpha$ -Araf were determined: the  $K_m$ ,  $k_{cat}$ , and  $k_{cat}/K_m$  values were 9.8 mM, 19.2 s<sup>-1</sup>, and 1.9 s<sup>-1</sup>mM<sup>-1</sup>, respectively. These parameters of BLLJ\_1853 could not be determined due to low activity for pNP- $\alpha$ -Araf.

### **Different effects of divalent metal ions on the activities of BLLJ\_1852**

**and BLLJ\_1853.** Some GH43 glycosidases were reported to have a calcium ion in their active site (22). The activities of the recombinant BLLJ\_1852 and BLLJ\_1853 for pNP- $\alpha$ -Araf were measured in the presence of various divalent metal ions. BLLJ\_1852 activity increased approximately 1.5-fold in the presence of all divalent metal cations tested (Zn<sup>2+</sup>, Mn<sup>2+</sup>, Cu<sup>2+</sup>, Ca<sup>2+</sup>, Co<sup>2+</sup>, Mg<sup>2+</sup>, and Ni<sup>2+</sup>). In contrast, BLLJ\_1853 activity was not enhanced by these cations and severely inhibited by Cu<sup>2+</sup> (Fig. 3A). Both glycosidases were inhibited by EDTA, suggesting a requirement for divalent metal ions (Fig. 3A). BLLJ\_1852 was more sensitive to EDTA than BLLJ\_1853 (Fig. 3B). Next, we tested whether these EDTA-treated enzymes could be restored or not by adding cations. BLLJ\_1852 and BLLJ\_1853 were treated with 100  $\mu$ M EDTA at 4°C for 16 hours, and then the activities

were measured in the presence of 1.0 mM  $\text{CaCl}_2$ . The activity of BLLJ\_1853 was fully restored by the addition of  $\text{Ca}^{2+}$ , whereas that of BLLJ\_1852 was not restored (Fig. 3C).

**Substrate specificities of BLLJ\_1852 and BLLJ\_1853.** As described above, both enzymes hydrolyzed pNP- $\alpha$ -Araf, indicating that they are exo-  $\alpha$ -L-arabinofuranosidases. We tested the activities of these enzymes for other pNP-glycosides, such as pNP- $\alpha$ -L-arabinopyranoside, pNP- $\beta$ -xylopyranoside, and pNP- $\beta$ -galactopyranoside, but no hydrolysis was observed (Fig. 4A). Therefore, these glycosidases have a strict specificity for  $\alpha$ -linked L-arabinofuranose. Next, we tested substrate specificities for natural substrates. Of the natural substrates tested, BLLJ\_1852 released L-arabinose from arabinan and arabinoxylan, and BLLJ\_1853 released L-arabinose from arabinan only (Figs. 4B and 4C, respectively). There are  $\alpha$ 1,2- and  $\alpha$ 1,3-arabinofuranosyl side-chains on the  $\alpha$ 1,5-poly-L-arabinofuranosyl backbone of arabinan. The same  $\alpha$ 1,2- and/or  $\alpha$ 1,3-arabinofuranosyl side-chains are on the xylan backbone of arabinoxylan. Next, we tested linkage specificities using synthetic arabinobioses: Araf $\alpha$ 1,2Araf $\alpha$ -OMe, Araf $\alpha$ 1,3Araf $\alpha$ -OMe, and Araf $\alpha$ 1,5Araf $\alpha$ -OMe. BLLJ\_1852 acted on the  $\alpha$ 1,2- and

$\alpha$ 1,3-linkages, whereas BLLJ\_1853 acted only on the  $\alpha$ 1,5-linkage (Fig. 4D). These results strongly suggest that BLLJ\_1852 hydrolyzes the side chains of arabinan and arabinoxylan, and BLLJ\_1853 hydrolyses the backbone of arabinan. Finally, we quantified the release rate of L-arabinose from five substrates (Table 1). Both enzymes showed the highest activity with arabinan. BLLJ\_1852 also acted on arabinoxylan, but the rate was only 0.6 % of that for arabinan. Synthetic glycosides, pNP- $\alpha$ -Araf and 4-methylumbelliferyl- $\alpha$ -Araf (4MU- $\alpha$ -Araf), were very slowly hydrolyzed by both enzymes. These results indicate that both enzymes have strict aglycone and linkage specificities.

## DISCUSSION

GH43 is a large family composed of more than 10,000 sequences and currently classified into 37 subfamilies (23). Nine enzymes with eleven GH43 domains from *B. longum* subsp. *longum* JCM 1217 are listed in the CAZy database. They are highly diversified with ten domains belonging to eight different subfamilies and one remaining unclassified. Four GH43 enzymes, including BLLJ\_1852 and BLLJ\_1853, have been

179 characterized. BLLJ\_0213, belonging to subfamily 29 of GH43 (GH43\_29), is a HypAA  
180  $\alpha$ -L-arabinofuranosidase specific for  $\alpha$ 1,3-linked Araf in  
181 Araf $\alpha$ 1,3Araf $\beta$ 1-2Araf $\beta$ 1-hydroxyprolin of plant glycoproteins (24). BLLJ\_1840,  
182 belonging to GH43\_24, is an exo- $\beta$ 1,3-galactanase that acts on the backbone of type II  
183 arabinogalactan (25). In this study, we found that BLLJ\_1852 (GH43\_27) and BLLJ\_1853  
184 (GH43\_22), which are exo- $\alpha$ -L-arabinofuranosidases, cooperatively degrade arabinan.  
185 BLLJ\_1852 hydrolyzed Araf $\alpha$ 1,2Araf $\alpha$ -OMe and Araf $\alpha$ 1,3Araf $\alpha$ -OMe, suggesting that it  
186 removes  $\alpha$ 1,2- and  $\alpha$ 1,3-linked Araf side chains from arabinan. BLLJ\_1853 specifically  
187 hydrolyzed Araf $\alpha$ 1,5Araf $\alpha$ -OMe, indicating that it processively degrades  $\alpha$ 1,5-linked  
188 L-arabinose of the arabinan backbone from the non-reducing terminus. BLLJ\_1852 also  
189 acted very slowly on arabinoxylan, which contains Araf $\alpha$ 1,2/3Xyl $\beta$ 1-R, but not on  
190 arabinogalactan, which contains Araf $\alpha$ 1,3Gal $\beta$ 1-R. Since Araf, Xyl $\beta$ , and Gal $\beta$  have  
191 equatorial hydroxyl groups at the C2 and C3 positions but only Gal $\beta$  has an axial hydroxyl  
192 group at the C4 position, BLLJ\_1852 may have a strict recognition of equatorial hydroxyl  
193 groups at the C4 position in aglycone.

194           Our preliminary results suggest that BLLJ\_1850 (GH43\_22\_34), BLLJ\_1851  
195   (GH43\_unclassified subfamily\_26), and BLLJ\_1854 (GH43\_22) are also  
196    $\alpha$ -L-arabinofuranosidases. BLLJ\_1850 rapidly acts on arabinoxylan and weakly on  
197   arabinogalactan, and BLLJ\_1851 rapidly acts on arabinan and weakly on arabinoxylan. The  
198   details will be reported elsewhere (Komeno *et al.*, in preparation). BLLJ\_1854 rapidly acts  
199   on arabinogalactan and weakly on arabinan (Fujita *et al.*, submitted). Except for  
200   BLLJ\_0213, these GH43 enzymes form a gene cluster, and there is almost no functional  
201   redundancy (Fig. 5A).

202           GH43\_27 is a small subfamily whose members are restricted in bacterial enzymes.  
203   So far only Abf43B  $\alpha$ -L-arabinofuranosidase from *Paenibacillus* sp. E18 (GenBank  
204   accession number AFC38437) (26) and GbtXyl43B  $\beta$ -D-xylosidase from *Geobacillus*  
205   *thermoleovorans* IT-08 (ABD48561) (27) have been experimentally characterized. The  
206   former hydrolyzed pNP- $\alpha$ -L-Araf but neither arabinan nor arabinoxylan, and the latter  
207   hydrolyzed pNP- $\beta$ -D-Xylp and xylan. Since BLLJ\_1852 is an arabinan-degrading  
208   exo-1,2-1,3- $\alpha$ -L-arabinofuranosidase, the substrate specificity of BLLJ\_1852 is quite

different from those of Abf43B and GbtXyl43B. The amino acid sequence of the GH43\_27 domain (aa 738–1,087) of BLLJ\_1852 had only 10 and 9 % identity with the corresponding domains of Abf43B and GbtXyl43B, respectively. Adult-type bifidobacteria have putative homologs with higher identities of 45–50 %: BAD\_0149 from *B. adolescentis* ATCC 15703, BBCT\_0647 from *B. catenulatum*, BBPC\_0158 from *B. pseudocatenulatum*, and BBSC\_0258 from *B. scardovii*. However, within the closely related strains of *B. longum* whose genomic data are available, the BLLJ\_1852 homolog was lost in several strains, such as *B. longum* 35264, *B. longum* BG7, and *B. longum* NCC2705 (Fig. 5B), and is also missing in *B. longum* subsp. *infantis*.

In comparison with GH43\_27, the subfamily GH43\_22 is relatively larger and more widely distributed in eukaryote (several fungi) and archaea in addition to bacteria. In this subfamily, we could not find an experimentally characterized enzyme. In our strain, there are three enzymes belonging to this subfamily, BLLJ\_1850 (GH43\_22\_34), BLLJ\_1853, and BLLJ\_1854, which exhibit distinct substrate preference for arabinoxylan, arabinan, and arabinogalactan, respectively, as described above. Within *B. longum* strains,

224 the homologs of BLLJ\_1853 and BLLJ\_1850 are conserved expect for *B. longum*  
 225 NCC2705, and those of BLLJ\_1854 are conserved in all strains (Fig. 5B). BLLJ\_1853 is  
 226 arabinan-degrading exo-1,5- $\alpha$ -L-arabinofuranosidase. The enzymes with similar substrate  
 227 specificity are classified in the subfamily GH43\_26: Araf43A (BAL68753) from  
 228 *Streptomyces avermitilis* MA-4680 (28, 29), and Abf43K (ACE82749) and Abf43L  
 229 (ACE84379) from *Cellvibrio japonicus* Ueda107 (30). However, BLLJ\_1853 shares very  
 230 low identities with the amino acid sequences of Araf43A (13%), Abf43K (11%), and  
 231 Abf43L (15%), suggesting that the evolutionary origin may be different. The  
 232 exo-1,5- $\alpha$ -L-arabinofuranosidase that belongs to the other families of GH51 was also  
 233 reported: AbfA (CAA99595) from *Bacillus subtilis* strain 168 (31).

234 It is known that *B. longum* subsp. *longum* is widely distributed in the intestines of  
 235 infants, adults, and elderly hosts. A recent study on the comparative genome analyses of  
 236 human isolates revealed that this GH43 gene cluster is enriched in strains from elderly  
 237 subjects (3). These findings suggest that this gene cluster is generally important for the  
 238 colonization of *B. longum* subsp. *longum* in the intestines of adults who consume

vegetables and grains.

## MATERIALS AND METHODS

**Bacterial strains and culture.** *B. longum* subsp. *longum* JCM 1217 was

obtained from the Japan Collection of Microorganisms (RIKEN Bioresource Center, Japan).

The strain was cultured in GAM broth (Nissui Pharmaceutical, Japan) or sugar-restricted

basal medium (1.0 % Bacto peptone, 0.5 % Bacto yeast extract, 0.5 % sodium acetate

trihydrate, 0.2 % di-ammonium hydrogen citrate, 0.08 % L-cysteine hydrochloride

monohydrate, 0.02 % magnesium sulfate heptahydrate, 1.36 % L-ascorbic acid, and 0.44 %

sodium carbonate anhydrous) at 37°C under anaerobic conditions using the AnaeroPack

Anaero (Mitsubishi Chemical, Japan). *Escherichia coli* DH5α and *E. coli*

BL21(λDE3)Δ*lacZ* (a gift from Prof. T. Katayama, Kyoto University, Kyoto, Japan) were

cultured in Luria-Bertani (LB) broth (BD, USA) at 37°C under aerobic conditions.

**Chemicals and substrates.** *p*-Nitrophenyl (pNP)-glycosides were purchased

from Sigma-Aldrich, MO, USA; sugar-beet arabinan and wheat arabinoxylan were

purchased from Megazyme, Ireland; larch wood arabinogalactan was purchased from Tokyo Chemical Industry, Japan; and L-arabinose was purchased from Wako Chemicals, Japan. Synthetic 1-*O*-methylated arabinobioses (Ara $\alpha$ 1,2Ara $\alpha$ -OMe, Ara $\alpha$ 1,3Ara $\alpha$ -OMe, and Ara $\alpha$ 1,5Ara $\alpha$ -OMe) were gifted from Prof. S. Kaneko, Ryukyu University, Japan (32). Other chemicals were obtained from Nacalai Tesque Inc., Japan.

#### **Growth assay of *B. longum* subsp. *longum*.** *B. longum* subsp. *longum*

JCM 1217 was inoculated in sugar-restricted basal medium supplemented with 1.0 % L-arabinose and cultured at 37°C under anaerobic conditions until the optical density at 600 nm (OD<sub>600</sub>) reached 1.0. A 10 % volume seed culture was added to basal medium containing 2.0 % arabinan, 2.0 % L-arabinose, or 2.0 % glucose. The wells of a 96-well plate were filled with these mixtures followed by sealing with Microseal B (Bio-Rad, USA). The plate was maintained at 37°C, and the OD<sub>600</sub> was monitored every 3 hours using Powerscan HT (Dainippon Sumitomo Pharma, Japan).

#### **Semi-quantitative RT-PCR.** *B. longum* subsp. *longum* JCM 1217 was cultured

at 37°C under anaerobic conditions in sugar-restricted basal medium with either 2.0 %

269 arabinan or 2.0 % glucose. RNA extraction was carried out using the TRIzol Reagent  
 270 (Thermo Fisher Scientific, MA, USA) and purification used the PureLink RNA Mini Kit  
 271 (Thermo Fisher Scientific). Reverse transcription was performed using PrimeScript Reverse  
 272 Transcriptase (Takara Bio Inc., Japan). Primers for RT-PCR were designed as follows:  
 273 5'-CCCAAGCTTGATACCACCGATTCATCGGCCGC and  
 274 5'-GTGCCGCTCGAGGGAGATGACGGCACCCGGCTTCTTG for *bllj\_1850*,  
 275 5'-CGCGGATCCGGACGACGCGACGCCTGCGGTG and  
 276 5'-CCCAAGCTTAGAGGACGGCAGACCGGAGTCTGC for *bllj\_1851*, 5'-  
 277 GGAATTCCATATGGATACCGTTCCGACCAATAATCTCATC and 5'-  
 278 CCCAAGCTTAGACAGACCGAGCTTGTTGCCCG for *bllj\_1852*, and 5'-  
 279 CGGAATTCGGAGAGCGCATCGCCAATCGATG and 5'-  
 280 GTGCCGCTCGAGGGTGTGGACAGAGCGCTGCCCGG for *bllj\_1853*. RT-PCR was  
 281 performed using TaKaRa Ex Taq HS (Takara Bio Inc.). PCR products were separated by  
 282 electrophoresis on a 0.8 % agarose gel. The gel staining used SYBR Gold Nucleic Acid Gel  
 283 Stain (Thermo Fisher Scientific). The densities of the bands were quantified using the

284 ImageJ program.

285 **Cloning, expression, and purification of BLLJ\_1852 and BLLJ\_1853.**

286 The DNA fragment for base pairs 106-3645 of *bllj\_1852* (GenBank accession number  
287 BAJ67516) without the coding sequences of the N-terminal signal peptide and C-terminal  
288 transmembrane region was amplified by high-fidelity PCR using KOD plus ver. 2 (Toyobo,  
289 Japan), genomic DNA from *B. longum* subsp. *longum* JCM 1217 as a template. The same  
290 pair of primers for RT-PCR with the NdeI and HindIII sites were used. The amplified  
291 fragment was ligated into the NdeI and HindIII sites of the pET23b(+) vector (Novagen,  
292 USA). Similarly, the DNA fragment of base pairs 91-3203 of *bllj\_1853* (BAJ67517) was  
293 amplified using same the pair of primers as the RT-PCR containing the EcoRI and XhoI  
294 sites. The product was ligated into corresponding sites of pET23b(+). The nucleotide  
295 sequences were confirmed by sequencing. The *E. coli* BL21( $\lambda$ DE3) $\Delta$ *lacZ* strain was  
296 transformed with these plasmids and cultured in LB liquid medium containing 100  $\mu$ g/mL  
297 ampicillin at 37°C under aerobic conditions until the OD<sub>600</sub> reached 0.35. Then the flask  
298 was put on ice in order to lower the temperature. Next, to induce expression, 0.1 mM

isopropyl- $\beta$ -D-thiogalactopyranoside (IPTG) was added to the culture, which was further incubated at 25°C for 15 hours. The cells were harvested by centrifugation and lysed with the BugBuster Protein Extraction Reagent (Novagen). The cell free protein extract was applied to a His GraviTrap (GE Healthcare, USA), and adsorbed proteins were eluted by a stepwise imidazole concentration gradient in 20 mM sodium acetate buffer at pH 6.5 containing 500 mM NaCl. The active fraction was dialyzed with a size 36 dialysis membrane (Wako Chemicals) against 0.5 mM sodium acetate buffer at pH 6.5 overnight at 4°C.

Protein concentration was measured using a Bio-Rad Protein Assay Dye Reagent Concentrate (Bio-Rad).

**Glycosidase assay.**  $\alpha$ -L-Arabinofuranosidase activity was measured based on the release of pNP from pNP- $\alpha$ -Araf. The reaction mixture containing 1.0 mM pNP-Araf, an appropriate amount of purified enzyme, and 1.0 mM sodium acetate buffer at pH 5.5 to a total volume of 50  $\mu$ L was incubated at 37°C. After the incubation, 1.5 volumes of 1.0 M Na<sub>2</sub>CO<sub>3</sub> was added as a stop solution, and the released pNP was measured at 405 nm. For

314 optimum pH tests, sodium acetate (pH 3.0–6.0), sodium phosphate (pH 6.5–7.5), and  
 315 Tris-HCl buffers (pH 8.0–10.0) were used. The 50 µL reaction mixture containing 1.0 mM  
 316 of each pH buffer, 1.0 mM pNP- $\alpha$ -Araf, and 5 µg enzyme was incubated at 37°C for 30  
 317 min (BLLJ\_1852) or overnight (BLLJ\_1853). For a stable pH assay, the enzyme was  
 318 pretreated in 10 mM buffer at 4°C for 24 hours, and then the remaining activity was  
 319 measured in sodium acetate buffer at pH 5.5. For the metal ion test, 5 mM chloride salts  
 320 (ZnCl<sub>2</sub>, MnCl<sub>2</sub>, CuCl<sub>2</sub>, CaCl<sub>2</sub>, CoCl<sub>2</sub>, MgCl<sub>2</sub>, and NiCl<sub>2</sub>) or EDTA 2Na were added to  
 321 reaction mixtures. For the assays for natural substrates, such as arabinan, arabinoxylan, and  
 322 arabinogalactan, the reaction mixture containing 0.5 % substrate, 1.0 mM sodium acetate  
 323 buffer at pH 5.5, and the indicated amount of enzyme was incubated at 37°C for the  
 324 appropriate period. The reaction mixture was analyzed by TLC or applied to enzymatic  
 325 measurements of released L-arabinose using an L-arabinose/D-galactose assay kit  
 326 (Megazyme).

327 **TLC.** TLC analysis was carried out using silica gel 60 plates (Merck, Germany)  
 328 with 1-butanol:acetic acid:water (2:1:1 by volume) or chloroform:methanol:acetic acid

(6:1:1 by volume) as developing solvents. Sugars were visualized by spraying  
acetone:aniline:diphenyl amine:phosphoric acid (100:1:1:10 by volume) and heating to  
150°C for 15 min.

## SUPPLEMENTAL MATERIAL

Supplemental material for this article may be found at ###  
SUPPLEMENTAL FILE 1, PDF file, ## MB.

## ACKNOWLEDGMENTS

We thank Prof. S. Kaneko (University of Ryukyus, Japan) for the kind gifts of  
 $\text{Ara}\alpha 1,2\text{Ara}\alpha\text{-OMe}$ ,  $\text{Ara}\alpha 1,3\text{Ara}\alpha\text{-OMe}$ , and  $\text{Ara}\alpha 1,5\text{Ara}\alpha\text{-OMe}$  and Prof. T.  
Katayama (Kyoto University, Japan) for providing *E. coli* BL21( $\lambda$ DE3) $\Delta lacZ$ . This work  
was supported by JSPS KAKENHI grants 15K07448 and 18K05494 (to H.A.).

We declare that there is no conflict of interest.

## REFERENCES

1. O'Callaghan A, Sinderen D. 2016. Bifidobacteria and their role as members of the human gut microbiota. *Front Microbiol* 7:925.
2. Mitsuoka T. 2014. Establishment of intestinal bacteriology. *Biosci Microbiota Food Health* 33:99-116.
3. Odamaki T, Bottacini F, Kato K, Mitsuyama E, Yoshida K, Horigome A, Xiao J-ZZ, van Sinderen D. 2018. Genomic diversity and distribution of *Bifidobacterium longum* subsp. *longum* across the human lifespan. *Sci Rep* 8:85.
4. Schell MA, Karmirantzou M, Snel B, Vilanova D, Berger B, Pessi G, Zwahlen M-CC, Desiere F, Bork P, Delley M, Pridmore RD, Arigoni F. 2002. The genome sequence of *Bifidobacterium longum* reflects its adaptation to the human gastrointestinal tract. *Proc Natl Acad Sci USA* 99:14422-14427.
5. Kitaoka M, Tian J, Nishimoto M. 2005. Novel putative galactose operon involving lacto-*N*-biose phosphorylase in *Bifidobacterium longum*. *Appl Environ Microbiol* 71:3158-3162.

6. Wada J, Ando T, Kiyohara M, Ashida H, Kitaoka M, Yamaguchi M, Kumagai H, Katayama T, Yamamoto K. 2008. *Bifidobacterium bifidum* lacto-*N*-biosidase, a critical enzyme for the degradation of human milk oligosaccharides with a type 1 structure. Appl Environ Microbiol 74:3996-4004.
7. Sela DA, Chapman J, Adeuya A, Kim JH, Chen F, Whitehead TR, Lapidus A, Rokhsar DS, Lebrilla CB, German JB, Price NP, Richardson PM, Mills DA. 2008. The genome sequence of *Bifidobacterium longum* subsp. *infantis* reveals adaptations for milk utilization within the infant microbiome. Proc Natl Acad Sci USA 105:18964-18969.
8. Ashida H, Miyake A, Kiyohara M, Wada J, Yoshida E, Kumagai H, Katayama T, Yamamoto K. 2009. Two distinct  $\alpha$ -L-fucosidases from *Bifidobacterium bifidum* are essential for the utilization of fucosylated milk oligosaccharides and glycoconjugates. Glycobiology 19:1010-1017.
9. Miwa M, Horimoto T, Kiyohara M, Katayama T, Kitaoka M, Ashida H, Yamamoto K. 2010. Cooperation of  $\beta$ -galactosidase and  $\beta$ -*N*-acetylhexosaminidase from

374 bifidobacteria in assimilation of human milk oligosaccharides with type 2 structure.  
375 Glycobiology 20:1402-1409.

376 10. Kiyohara M, Tanigawa K, Chaiwangsi T, Katayama T, Ashida H, Yamamoto K.  
377 2011. An exo- $\alpha$ -sialidase from bifidobacteria involved in the degradation of  
378 sialyloligosaccharides in human milk and intestinal glycoconjugates. Glycobiology  
379 21:437-447.

380 11. Yamada C, Gotoh A, Sakanaka M, Hattie M, Stubbs K, Katayama-Ikegami A,  
381 Hirose J, Kurihara S, Arakawa T, Kitaoka M, Okuda S, Katayama T, Fushinobu S.  
382 2017. Molecular insight into evolution of symbiosis between breast-fed infants and  
383 a member of the human gut microbiome *Bifidobacterium longum*. Cell Chem Biol  
384 24:515-524.e5.

385 12. Fujita K, Oura F, Nagamine N, Katayama T, Hiratake J, Sakata K, Kumagai H,  
386 Yamamoto K. 2005. Identification and molecular cloning of a novel glycoside  
387 hydrolase family of core 1 type *O*-glycan-specific  
388 endo- $\alpha$ -*N*-acetylgalactosaminidase from *Bifidobacterium longum*. J Biol Chem

45:37415-37422.

13. Kiyohara M, Nakatomi T, Kurihara S, Fushinobu S, Suzuki H, Tanaka T, Shoda S,

Kitaoka M, Katayama T, Yamamoto K, Ashida H. 2012.

$\alpha$ -N-Acetylgalactosaminidase from infant-associated bifidobacteria belonging to a

novel glycoside hydrolase family 129 is implicated in an alternative mucin

degradation pathway. J Biol Chem 1:693-700.

14. Wakinaka T, Kiyohara M, Kurihara S, Hirata A, Chaiwangsri T, Ohnuma T,

Fukamizo T, Katayama T, Ashida H, Yamamoto K. 2012. Bifidobacterial

$\alpha$ -galactosidase with unique carbohydrate-binding module specifically acts on blood

group B antigen. Glycobiology 2:232-240.

15. Shimada Y, Watanabe Y, Wakinaka T, Funeno Y, Kubota M, Chaiwangsri T,

Kurihara S, Yamamoto K, Katayama T, Ashida H. 2015.

$\alpha$ -N-Acetylglucosaminidase from *Bifidobacterium bifidum* specifically hydrolyzes

$\alpha$ -linked N-acetylglucosamine at nonreducing terminus of O-glycan on gastric

mucin. Appl Microbiol Biotechnol 99:3941-3948.

- 404 16. Fujita K, Sakamoto S, Ono Y, Wakao M, Suda Y, Kitahara K, Suganuma T. 2010.  
405 Molecular cloning and characterization of a  $\beta$ -L-arabinobiosidase in  
406 *Bifidobacterium longum* that belongs to a novel glycoside hydrolase family. J  
407 Biol Chem 7:5143-5150.
- 408 17. Fujita K, Takashi Y, Obuchi E, Kitahara K, Suganuma T. 2014. Characterization of  
409 a novel  $\beta$ -L-arabinofuranosidase in *Bifidobacterium longum*: functional elucidation  
410 of a DUF1680 family member. J Biol Chem 8:5240-5249.
- 411 18. Fujita K, Kitahara K, Suganuma T. 2012. Functional analysis of degradative  
412 enzymes for hydroxyproline-linked  $\beta$ -L-arabinofuranosides in *Bifidobacterium*  
413 *longum*. Trends Glycosci Glycotech 24:215-224.
- 414 19. Laere K, Hartemink R, Bosveld M, Schols H, Voragen A. 2000. Fermentation of  
415 plant cell wall derived polysaccharides and their corresponding oligosaccharides by  
416 intestinal bacteria. J Agric Food Chem 48:1644-1652.
- 417 20. Holck J, Lorentzen A, Vigsnaes LK, Licht TR, Mikkelsen JD, Meyer AS. 2011.  
418 Feruloylated and nonferuloylated arabino-oligosaccharides from sugar beet pectin

419 selectively stimulate the growth of *Bifidobacterium* spp. in human fecal in  
 420 vitro fermentations. J Agric Food Chem 59:6511-6519.

421 21. Westphal Y, Kühnel S, de Waard P, Hinz SW. A, Schols H. A, Voragen AG. J,  
 422 Gruppen H. 2010. Branched arabino-oligosaccharides isolated from sugar beet  
 423 arabinan. Carbohydr Res 345:1180-1189.

424 22. De Sanctis D, Inácio JM, Lindley PF, Sá-Nogueira I, Bento I. 2010. New evidence  
 425 for the role of calcium in the glycosidase reaction of GH43 arabinanases. FEBS J  
 426 277:4562-4574.

427 23. Jordan DB, Braker JD, Wagschal K, Lee CC, Chan VJ, Dubrovskaya I, Anderson S,  
 428 Wawrzak Z. 2015. X-ray crystal structure of divalent metal-activated  $\beta$ -xylosidase,  
 429 RS223BX. Appl Biochem Biotechnol 117:637-648.

430 24. Mewis K, Lenfant N, Lombard V, Henrissat B. 2016. Dividing the large glycoside  
 431 hydrolase family 43 into subfamilies: a motivation for detailed enzyme  
 432 characterization. Appl Environ Microbiol 82:1686-1692.

433 25. Fujita K, Sakaguchi T, Sakamoto A, Shimokawa M, Kitahara K. 2014.

- 434 *Bifidobacterium longum* subsp. *longum* exo- $\beta$ -1,3-galactanase is an enzyme for the  
435 degradation of type II arabinogalactan. Appl Environ Microbiol 80:4577-4584.
- 436 26. Shi P, Chen X, Meng K, Huang H, Bai Y, Luo H, Yang P, Yao B. 2013. Distinct  
437 actions by *Paenibacillus* sp. E18  $\alpha$ -L-arabinofuranosidases and xylanase on xylan  
438 degradation. Appl Environ Microbiol 79:1990-1995.
- 439 27. Ratnadewi AAI, Fanani M, Kurniasih SD, Sakka M, Wasito EB, Sakka K,  
440 Nurachman Z, Puspaningsih NNT. 2013.  $\beta$ -D-Xylosidase from *Geobacillus*  
441 *thermoleovorans* IT-08: biochemical characterization and bioinformatics of the  
442 enzyme. Appl Biochem Biotechnol 170:1950-1964.
- 443 28. Ichinose H, Yoshida M, Fujimoto Z, Kaneko S. 2008. Characterization of a modular  
444 enzyme of exo-1,5- $\alpha$ -L-arabinofuranosidase and arabinan binding module from  
445 *Streptomyces avermitilis* NBRC14893. Appl Environ Microbiol 80:399-408.
- 446 29. Fujimoto Z, Ichinose H, Maehara T, Honda M, Kitaoka M, Kaneko S. 2010. Crystal  
447 structure of an exo-1,5- $\alpha$ -L-arabinofuranosidase from *Streptomyces avermitilis*  
448 provides insights into the mechanism of substrate discrimination between exo- and

endo-type enzymes in glycoside hydrolase family 43. J Biol Chem 44:34134-34143.

30. Cartmell A, McKee L, Peña MJ, Larsbrink J, Brumer H, Kaneko S, Ichinose H,

Lewis RJ, Viksø-Nielsen A, Gilbert HJ, Marles-Wright J. 2011. The structure and

function of an arabinan-specific  $\alpha$ -1,2-arabinofuranosidase identified from

screening the activities of bacterial GH43 glycoside hydrolases. J Biol Chem

17:15483-15495.

31. Inácio JM, Correia IL, de Sá-Nogueira I. 2008. Two distinct arabinofuranosidases

contribute to arabino-oligosaccharide degradation in *Bacillus subtilis*. Microbiology

154:2719-2729.

32. Kawabata Y, Kaneko S, Kusakabe I, Gama Y. 1995. Synthesis of regioisomeric

methyl  $\alpha$ -L-arabinofuranobiosides. Carbohydr Res 267:39-47.

## FIGURE LEGENDS

**FIG 1** Growth of *B. longum* subsp. *longum* JCM 1217 in media containing different carbon sources. The strain was cultured at 37 °C in sugar-restricted basal medium supplemented with 1.0 % of different carbon sources under anaerobic conditions. OD<sub>600</sub> was measured every 3 hours for 48 hours. Error bars indicate SD (n = 6). Symbols: circle, no sugar; triangle, arabinan; diamond, L-arabinose; square, glucose.

**FIG 2** Characterization of BLLJ\_1852 and BLLJ\_1853. (A) Domain structure of BLLJ\_1852 and BLLJ\_1853. (B) SDS-PAGE of purified BLLJ\_1852. (C) SDS-PAGE of purified BLLJ\_1853. M, molecular size markers.

**FIG 3** Effects of divalent metal ions on the activities of BLLJ\_1852 and BLLJ\_1853. (A) Effects of metal ions on the activities of recombinant enzymes. The divalent metal ions were added at 5.0 mM. (B) Effects of various concentration of EDTA on recombinant

enzymes. (C) Restoration of enzyme activity by addition of  $\text{Ca}^{2+}$  after treatment with EDTA.

pNP- $\alpha$ -Araf was used as a substrate in all experiments. Error bars indicate SD (n=3).

**FIG 4** Substrate specificities of BLLJ\_1852 and BLLJ\_1853. The substrates were incubated with recombinant BLLJ\_1852 or BLLJ\_1853 at 37°C overnight and analyzed by TLC. (A) Action on synthetic substrates.  $\alpha$ -Araf, pNP- $\alpha$ -L-arabinofuranoside;  $\alpha$ -Arap, pNP- $\alpha$ -L-arabinopyranoside;  $\beta$ -Xylp, pNP- $\beta$ -xylopyranoside;  $\beta$ -Galp, pNP- $\beta$ -galactopyranoside; Ara, standard L-arabinose; Xyl, standard xylose; Gal, standard galactose. (B) Action of BLLJ\_1852 on natural substrates. AX, arabinoxylan; AG, arabinogalactan; AN, arabinan; Ara, standard L-arabinose. (C) Action of BLLJ\_1853 on natural substrates. AX, arabinoxylan; AG, arabinogalactan; AN, arabinan; Ara, standard L-arabinose. (D) Action of BLLJ\_1852 and BLLJ\_1853 on synthetic disaccharide substrates.  $\alpha$ 2, Arafa $\alpha$ 1,2Arafa $\alpha$ -OMe;  $\alpha$ 3, Arafa $\alpha$ 1,3Arafa $\alpha$ -OMe;  $\alpha$ 5, Arafa $\alpha$ 1,5Arafa $\alpha$ -OMe; Ara, standard L-arabinose. The developing solvent used in panels A-C was 1-Butanol:acetic

acid:water (2:1:1, by volume); chloroform:methanol:acetic acid (6:1:1, by volume) was

used for panel D.

**FIG 5** (A) Map of the hemicellulose-degrading gene cluster in *B. longum* subsp. *longum* JCM 1217. Gray boxes, glycosidases; striped boxes, sugar transporters; black boxes, transcriptional regulators; white boxes, hypothetical proteins. BLLJ\_1850 and BLLJ\_1850 have two GH43 domains, and the N-terminal GH43 domain of BLLJ\_1850 belongs to an unclassified (UC) subfamily. (B) Conservation of the GH43 cluster in various *B. longum* strains. Scores indicated above the boxes indicate percentage identity of amino acid sequences with those of *B. longum* subsp. *longum* JCM 1217.

**TABLE 1** Specific activities of BLLJ\_1852 and BLLJ\_1853 for various substrates

|                  | pNP          | 4MU         | AN          | AX        | AG        |
|------------------|--------------|-------------|-------------|-----------|-----------|
| BLLJ_1852        | 1.00         | 0.62        | 70.23       | 0.62      | nd        |
| <u>BLLJ_1853</u> | <u>0.009</u> | <u>0.23</u> | <u>4.42</u> | <u>nd</u> | <u>nd</u> |

Reaction mixtures were incubated at 37°C for 30 min. The released L-arabinose was determined by the enzymatic measurement method, and the relative values are shown. pNP, pNP- $\alpha$ -L-arabinofuranoside; 4MU, 4-methylumbelliferyl- $\alpha$ -L-arabinofuranoside; AN, sugar-beet arabinan; AX, wheat arabinoxylan; AG, larch wood arabinogalactan; nd, not detected.

514 **Fig. S1** General properties of recombinant BLLJ\_1852 and BLLJ\_1853. pNP- $\alpha$ -Araf was  
 515 incubated with recombinant enzymes at 37°C. (A) Effect of pH on BLLJ\_1852. (B) Effect  
 516 of pH on BLLJ\_1853. (C) Effect of temperature on BLLJ\_1852. (D) Effect of temperature  
 517 on BLLJ\_1853. (E) Thermal stability of BLLJ\_1853 at high temperatures. Error bars  
 518 indicate SD (n=3). For stability tests, enzymes were pre-incubated in each pH buffer for 16  
 519 hours at 37°C or in sodium acetate buffer (pH 6.0) at each temperature for 1 hour.  
 520

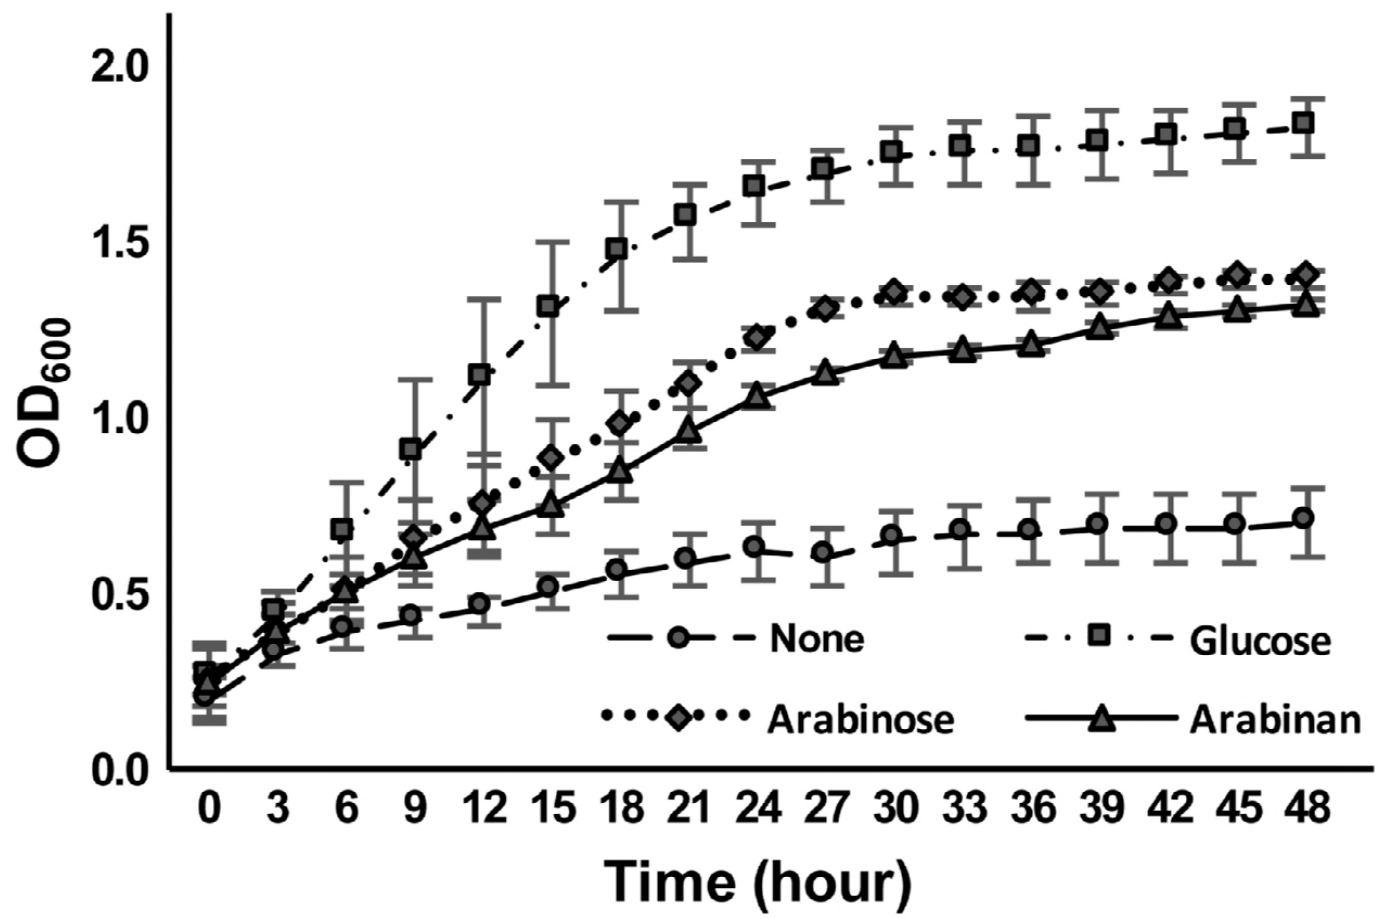

**Fig. 1. Komeno et. al.**

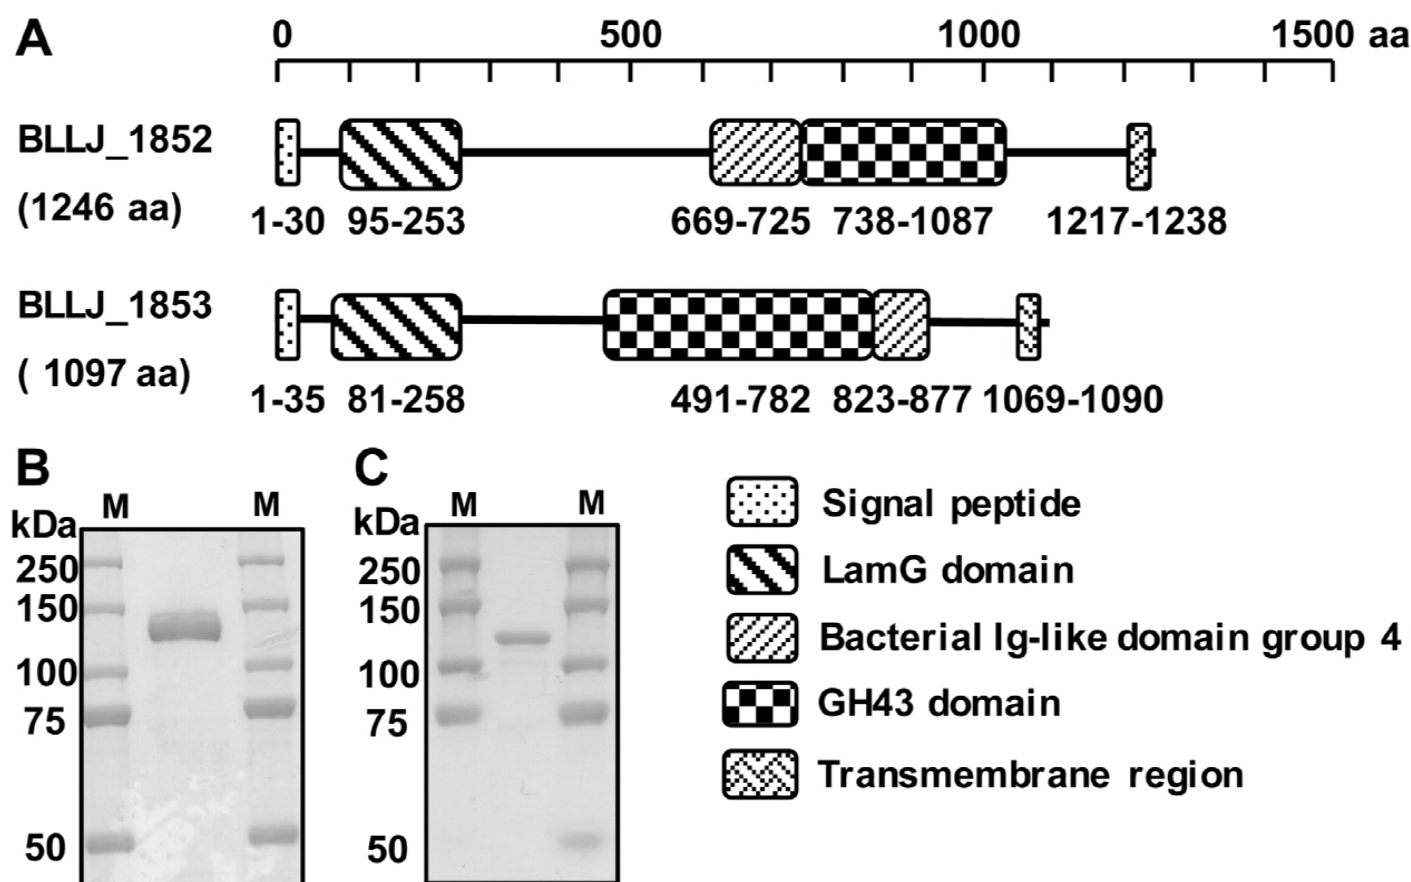

**Fig. 2. Komeno et. al.**

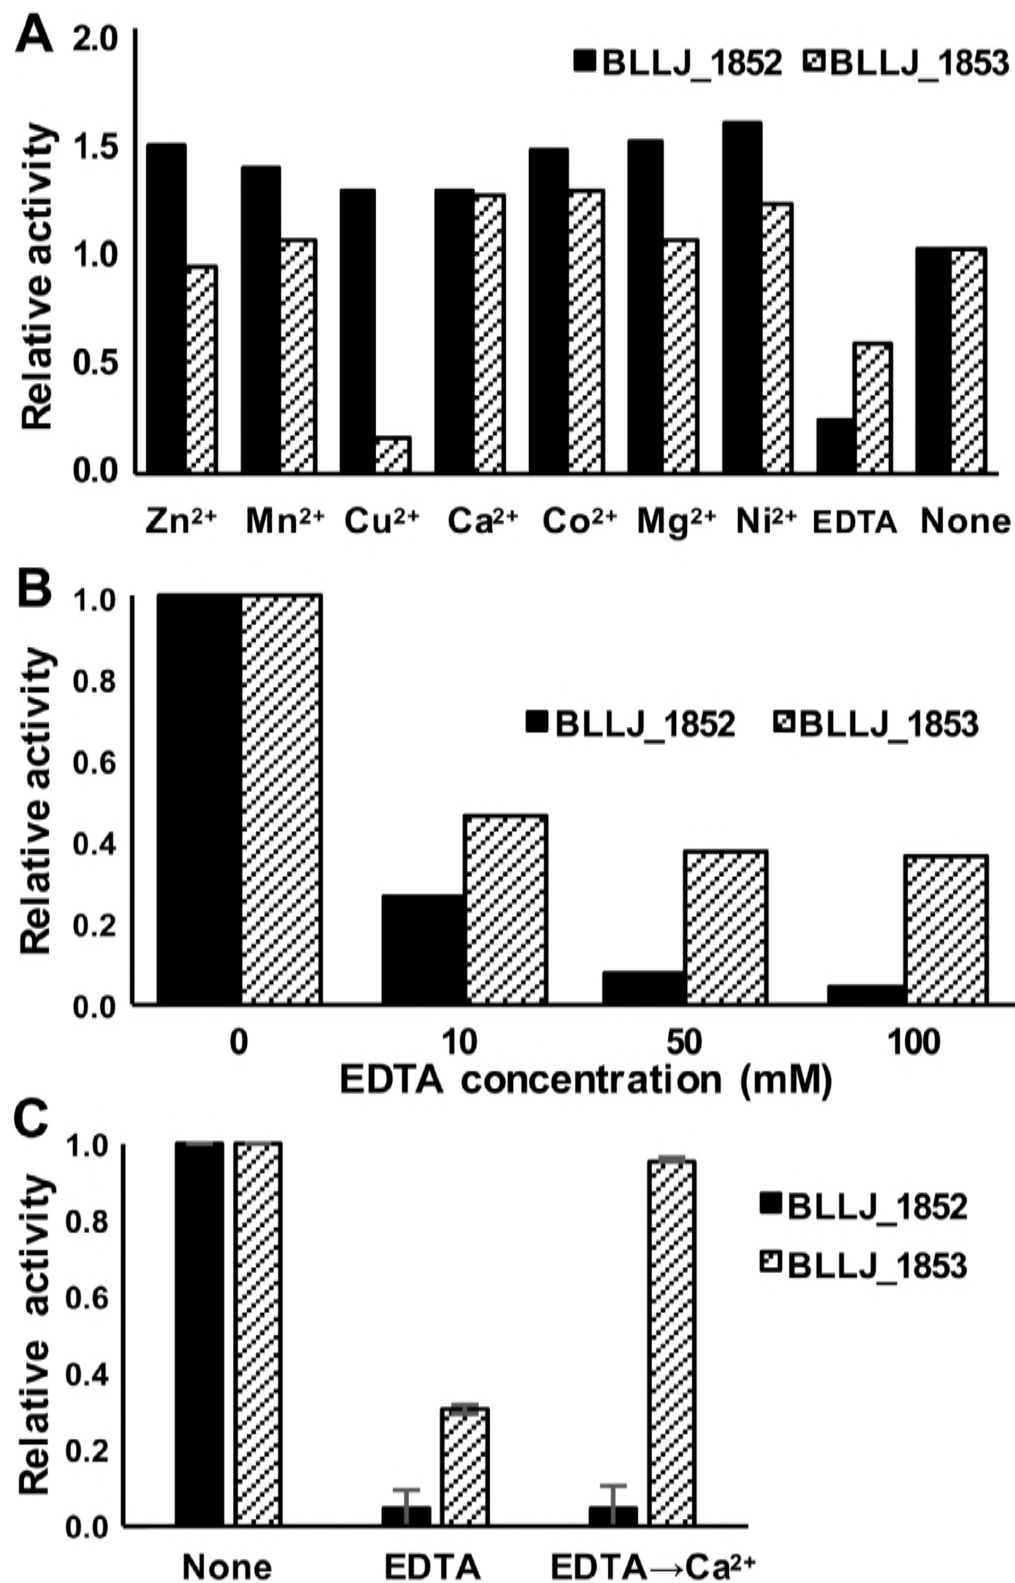

**Fig. 3. Komeno et. al.**

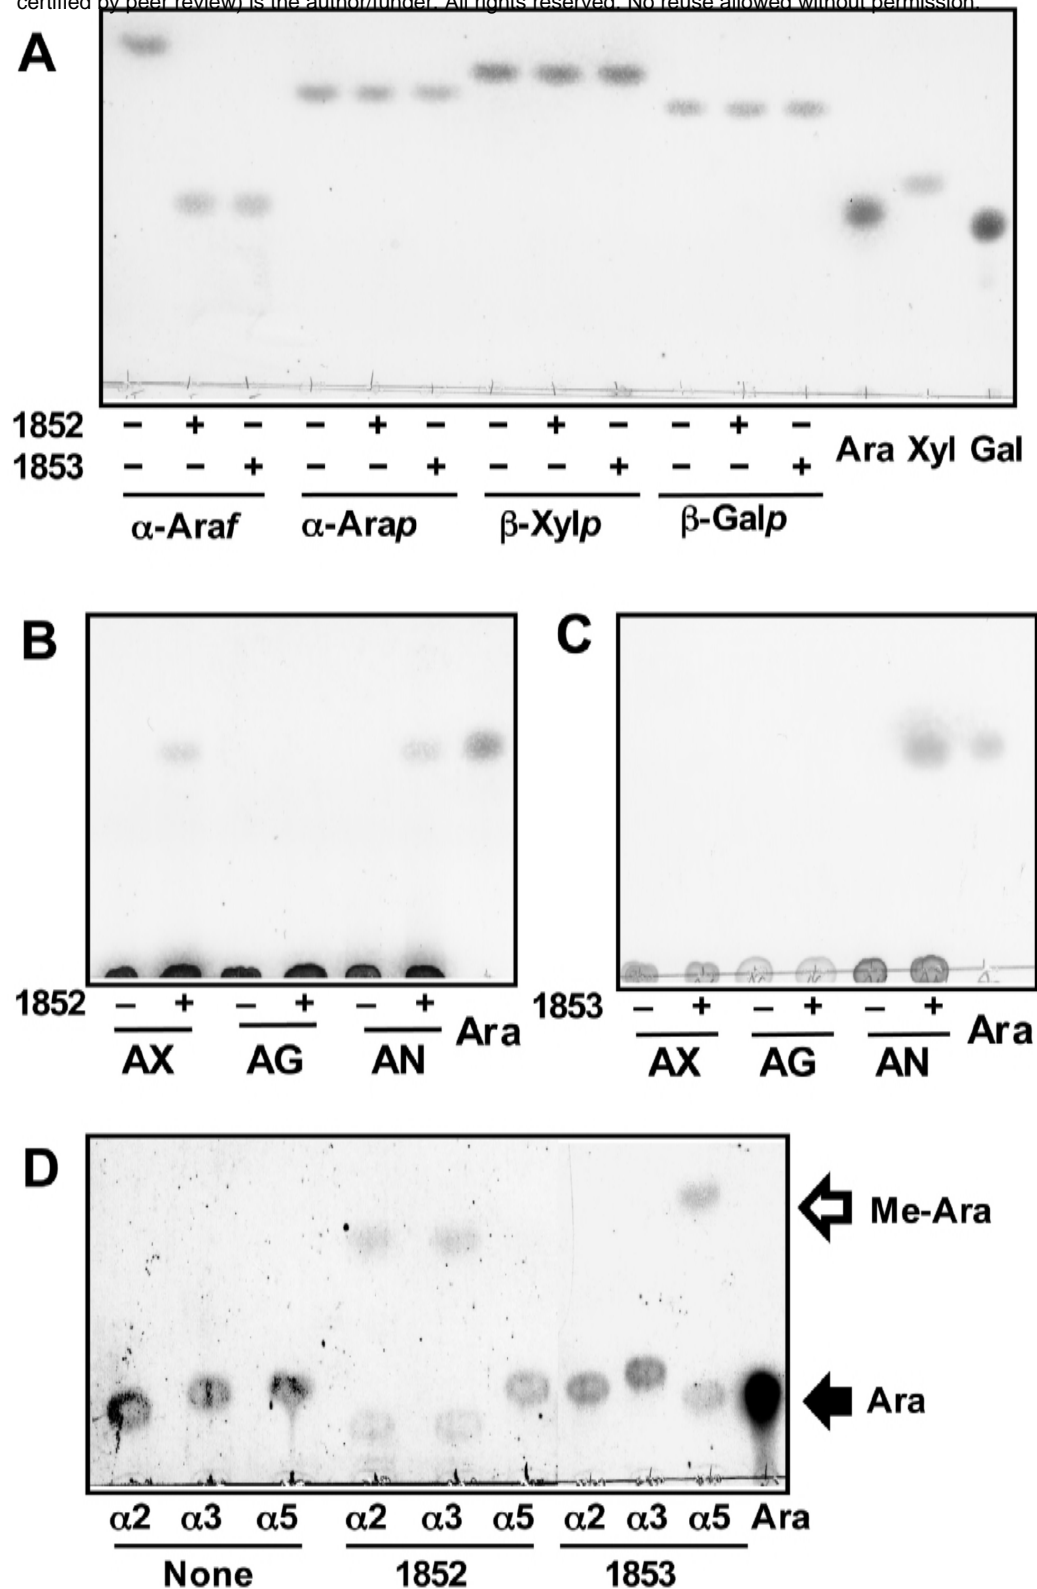

**Fig. 4. Komeno et. al.**

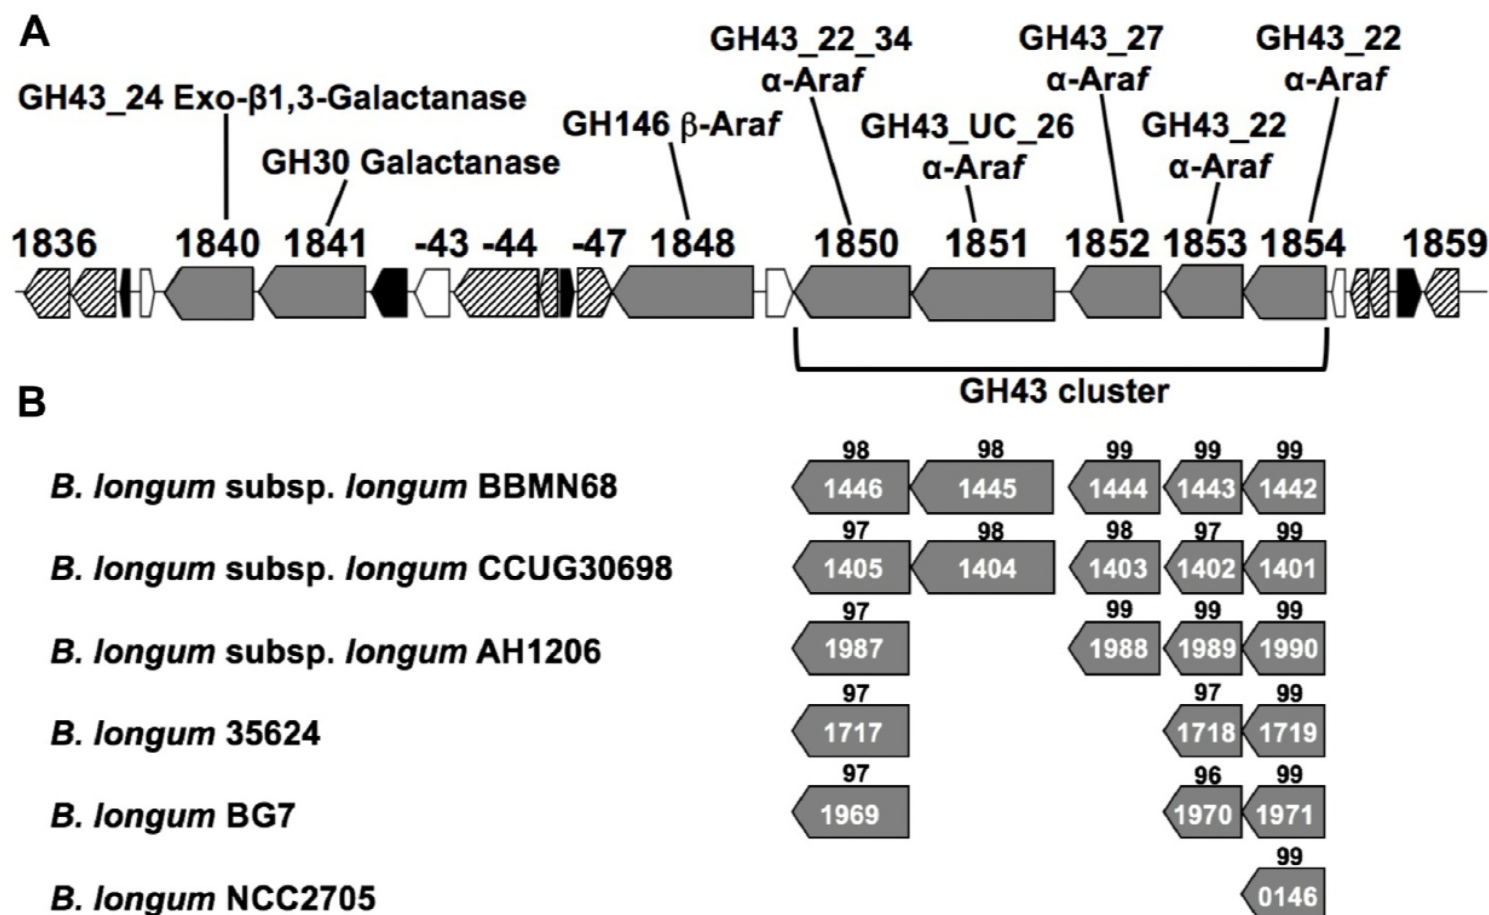

Fig. 5. Komeno et. al.
